# Supplementary material
Source: MDPI journal article supplement (https://www.mdpi.com/1999-4907/10/3/220)

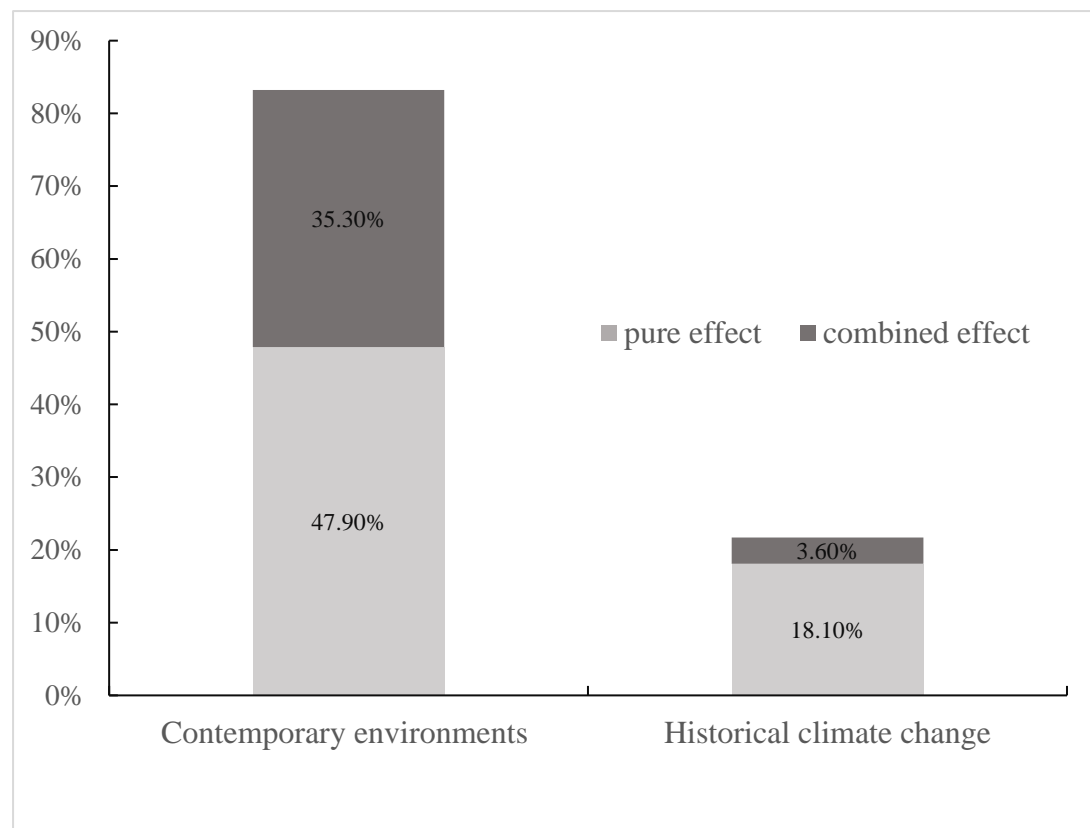

Supplement: s1 [file s1]

A

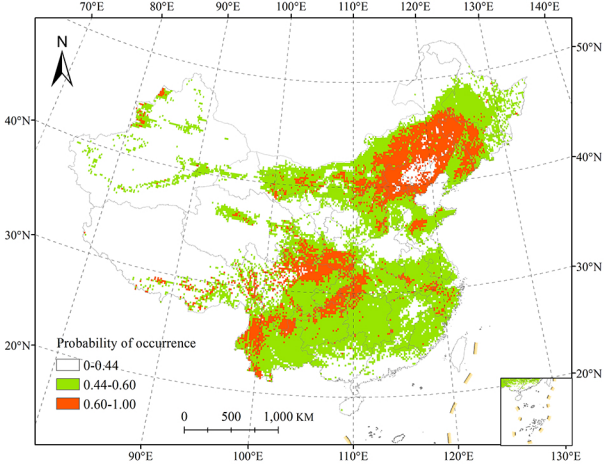

B

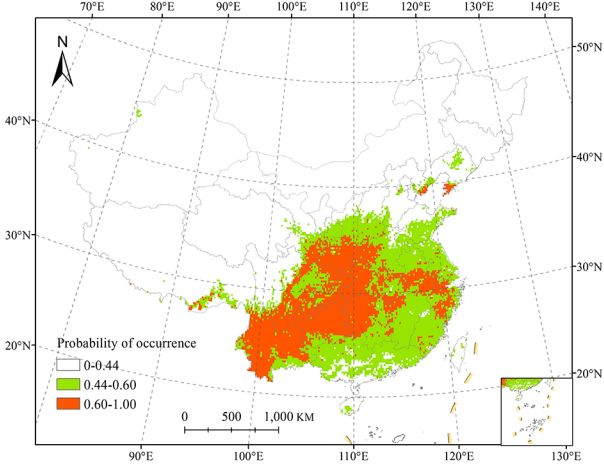

C

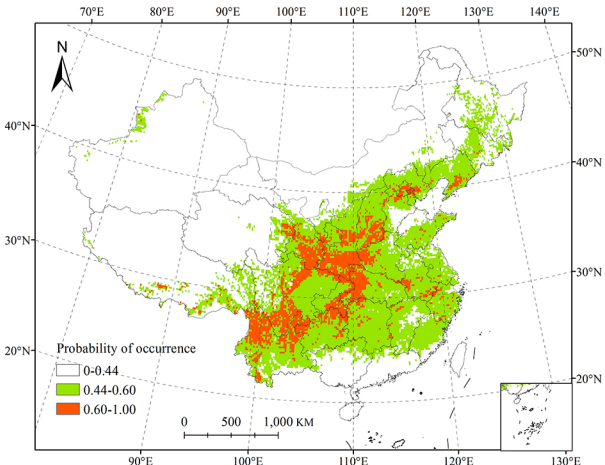

D

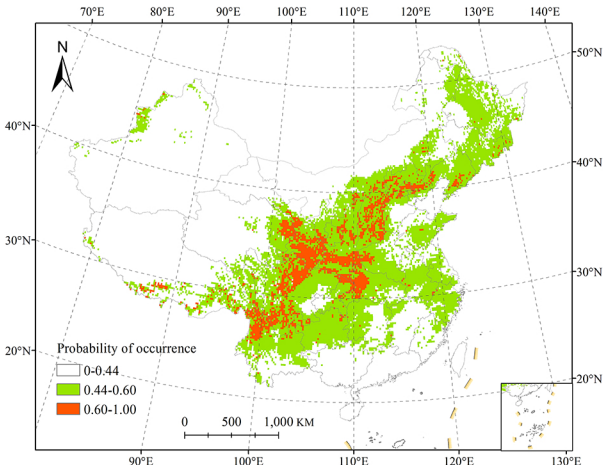

E

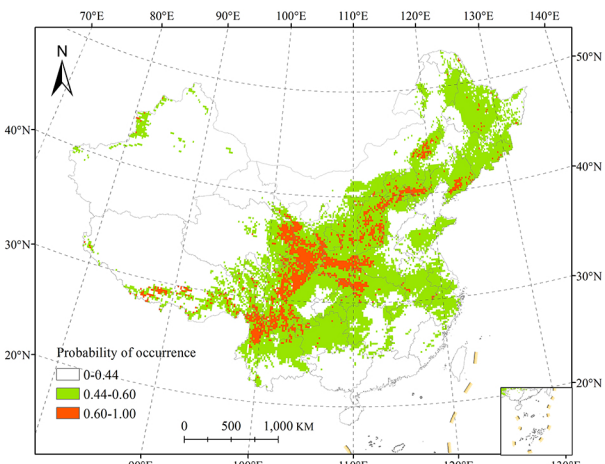

F

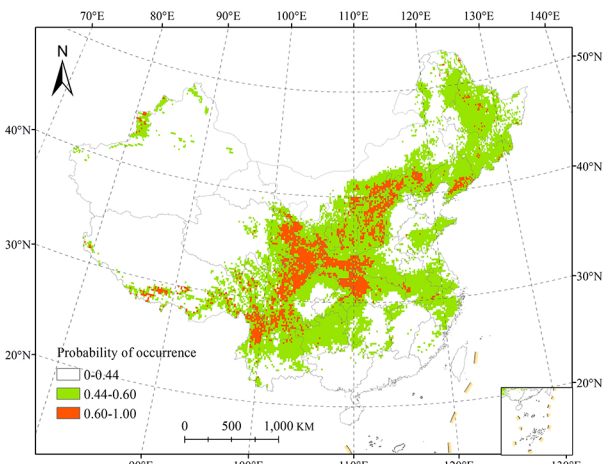

G

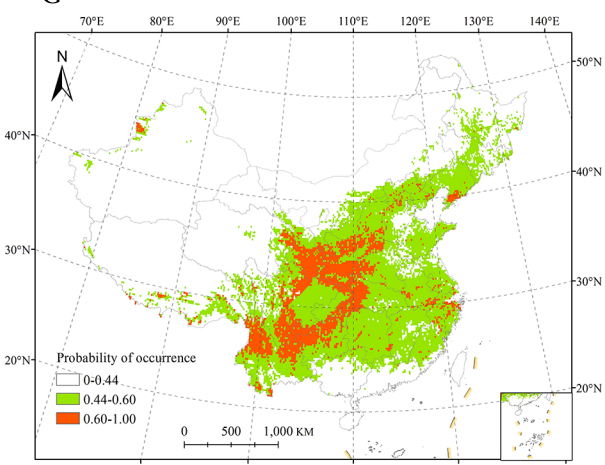

Supplement: s1 [file s1]

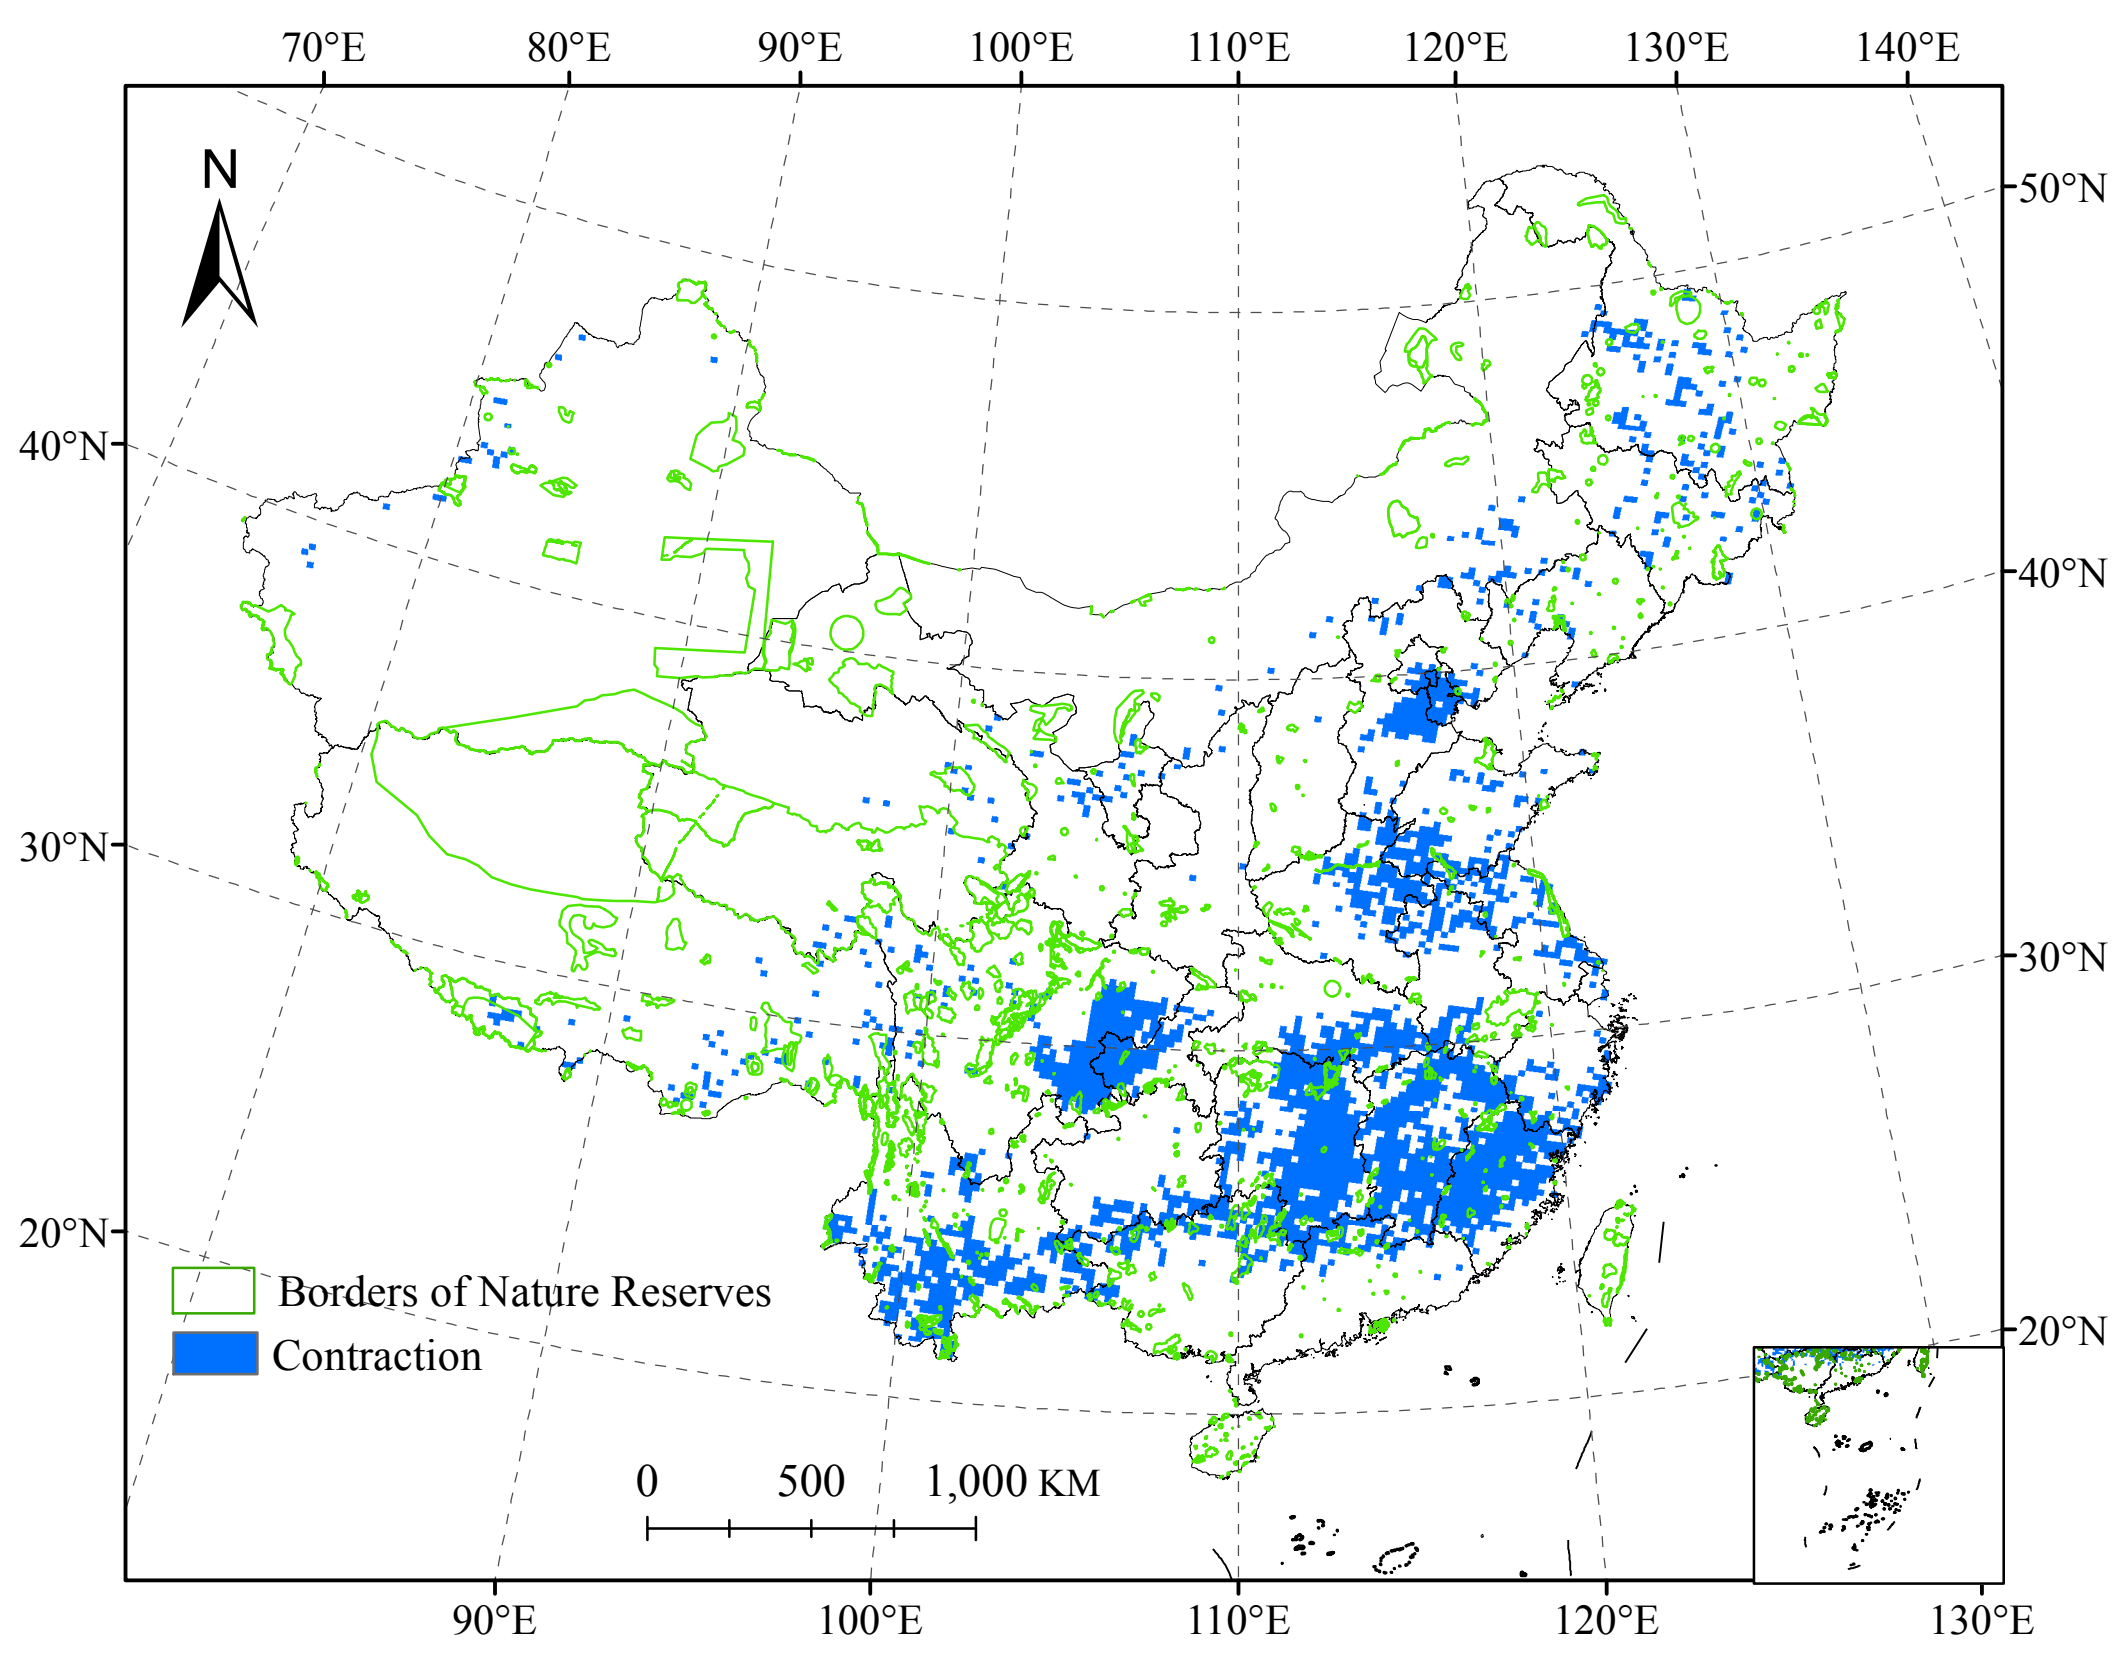

Supplement: s1 [file s1]
